# Supplementary material for: Persistent Depletion of Neuroprotective Factors Accompanies Neuroinflammatory, Neurodegenerative, and Vascular Remodeling Spectra in Serum Three Months after Non-Emergent Cardiac Surgery
Source: MDPI journal article supplement (doi:10.3390/biomedicines10102364), 2022-09-22
Supplement: s1 [file s1]

**Table S1.** Comparison of patients with pre-existing stroke, peri-operative stroke, or without any history of CVA.

|                                                      | History of CVA<br>(n = 12) | CVA After Surgery<br>(n = 16) | None<br>(n = 137) |
|------------------------------------------------------|----------------------------|-------------------------------|-------------------|
| <b>Demographics</b>                                  |                            |                               |                   |
| <b>Age (years)</b>                                   |                            |                               |                   |
| mean ± SD                                            | 58.9 ± 14.7                | 69.7 ± 7.8                    | 70.3 ± 7.6        |
| Over 60 [%]                                          | 75                         | 92.3                          | 100               |
| <b>Sex</b>                                           |                            |                               |                   |
| Male [%]                                             | 75                         | 76.9                          | 100               |
| Female [%]                                           | 25                         | 23.1                          | 0                 |
| Not Reported [%]                                     | 0                          | 0                             | 0                 |
| <b>Race</b>                                          |                            |                               |                   |
| Black [%]                                            | 8.3                        | 7.7                           | 25                |
| White [%]                                            | 83.3                       | 92.3                          | 75                |
| Other/Asian/Unknown [%]                              | 8.3                        | 0                             | 0                 |
| <b>Pre-Existing Conditions</b>                       |                            |                               |                   |
| Weight (kg) [mean ± SD]                              | 87.1 ± 23.0                | 86.0 ± 28.4                   | 83.0 ± 15.9       |
| BMI [mean ± SD]                                      | 28.9 ± 5.8                 | 27.6 ± 7.3                    | 26.8 ± 4.0        |
| CCI [mean ± SD]                                      | <b>4.5 ± 2.1 *</b>         | <b>4.6 ± 1.6 *</b>            | 6.5 ± 1.3         |
| ACS/MI [%]                                           | 16.7                       | 23                            | 50                |
| CHF [%]                                              | 8.3                        | 23                            | 25                |
| NT-BNP [mean ± SD]                                   | 5994.3 ± 8504.2            | 4651.8 ± 5861.7               | 3105.2 ± 4567.0   |
| PVD [%]                                              | 8.3                        | 15.4                          | 25                |
| COPD [%]                                             | 8.3                        | 15.4                          | 25                |
| DM [%]                                               | 33.3                       | 38.5                          | 25                |
| Hb1AC [mean ± SD]                                    | 5.8 ± 0.46                 | 6.7 ± 2.2                     | 6.1 ± 1.1         |
| <b>Anesthesia and Surgery Data</b>                   |                            |                               |                   |
| Duration of anesthesia (min) [mean ± SD]             | 377.8 ± 114.4              | 418.0 ± 116.2                 | 370.4 ± 104.8     |
| Duration of surgery (min) [mean ± SD]                | 269.2 ± 99.5               | 305.4 ± 121.9                 | 261.6 ± 98.3      |
| Duration of cardiopulmonary bypass (min) [mean ± SD] | 127.7 ± 56.7               | 167.4 ± 111.4                 | 127.6 ± 61.5      |
| Coronary artery bypass surgery (n)                   | 12                         | 9                             | 129               |
| Mitral valvuloplasty and replacement (n)             | 4                          | 4                             | 29                |
| Aortic valvuloplasty and replacement (n)             | 3                          | 2                             | 56                |
| Aortic aneurysm repair (n)                           | 1                          | 0                             | 18                |
| Others (n)                                           | 1                          | 4                             | 5                 |
| Estimated Blood Loss (mL) [mean ± SD]                | 262.5 ± 389.7              | 137.5 ± 43.3                  | 205.3 ± 292.1     |
| <b>Peri-operative Management</b>                     |                            |                               |                   |
| <b>Transfusions during surgery</b>                   |                            |                               |                   |
| Packed Red Blood Cells (mL) [mean ± SD]              | 9.0 ± 63.3                 | 184.6 ± 357.9                 | 100.7 ± 241.1     |
| Fresh Frozen Plasma, (mL) [mean ± SD]                | 104.2 ± 225.1              | 269.2 ± 554.0                 | 70.9 ± 215.9      |
| Total crystalloid during surgery (mL) [mean ± SD]    | 1600.0 ± 797.5             | 1700.0 ± 892.6                | 1256.0 ± 528.8    |
| <b>Clinical Care during 24 h post-surgery</b>        |                            |                               |                   |
| Packed Red Blood Cells (mL) [mean ± SD]              | 50.0 ± 173.2               | <b>115.4 ± 195.1 *</b>        | 9.0 ± 63.3        |
| Fresh Frozen Plasma (mL) [mean ± SD]                 | 0.0 ± 0.0                  | <b>69.2 ± 249.6 *</b>         | 0.0 ± 0.0         |
| Opioids Administration (mg) [mean ± SD]              | 757.3 ± 270.1              | 660.7 ± 233.4                 | 702.2 ± 233.4     |

|                                                    |               |               |      |            |
|----------------------------------------------------|---------------|---------------|------|------------|
| Benzodiazepine administration (mg) [mean $\pm$ SD] | 2.6 $\pm$ 6.8 | 2.5 $\pm$ 6.5 | 0.13 | $\pm$ 0.47 |
|----------------------------------------------------|---------------|---------------|------|------------|

ACS = acute coronary syndrome , BMI = body mass index, CCI = Charlson Comorbidity Index , CHF = congestive heart failure, COPD = chronic obstructive pulmonary disease, CVA = , DM = diabetes melitis, MI = myocardial infarction, NT-BNP = N-terminal pro b-type natriuretic peptide, PVD = peripheral vascular disease, SD = standard deviation, \*  $p < 0.05$ .

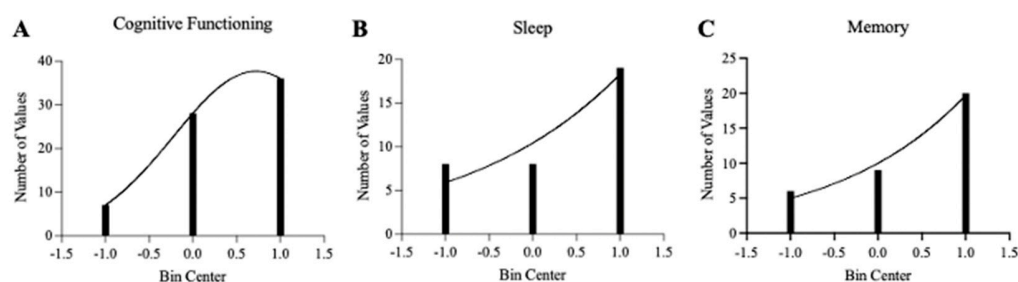

**Figure S1.** Cognitive assessments pre- and post-surgery. Distribution of cognitive function (A), sleep (B), and memory (C) assessment results. Pre-surgery baseline (bin center 0) compared with better (+1) or worse (-1) post-surgical assessment results.
